# Supplementary material for: Early Evidence of Shifts in Alpine Summit Vegetation: A Case Study From Kashmir Himalaya
Source: PubMed Central journal article supplement (PMC7194130; doi:10.3389/fpls.2020.00421), 2020-04-24
Supplement: Data_Sheet_1.pdf [file Data_Sheet_1.pdf]

**Supplementary material**

**Early Evidence of Shifts in Alpine Summit Vegetation: A Case Study from Kashmir Himalaya**

*Maroof Hamid<sup>1\*</sup>, Anzar Ahmad Khuroo<sup>1</sup>, Akhtar Hussain Malik<sup>1</sup>, Rameez Ahmad<sup>1</sup>,  
Chandra Prakash Singh<sup>2</sup>, Jiri Dolezal<sup>3,4</sup>, Shiekh Marifatul Haq<sup>1</sup>*

<sup>1</sup>Centre for Biodiversity & Taxonomy, Department of Botany  
University of Kashmir, Srinagar, J&K, India

<sup>2</sup>Space Applications Centre, Indian Space Research Organization,  
Ahmedabad, India

<sup>3</sup>Institute of Botany, The Czech Academy of Sciences, Zamek,  
Pruhonice, Czech Republic

<sup>4</sup>Faculty of Science, Department of Botany, University of South Bohemia,  
Ceske Budejovice, Czechia

**\*Correspondence**

Maroof Hamid

E-mail: [hamidmaroofmudasir@gmail.com](mailto:hamidmaroofmudasir@gmail.com)

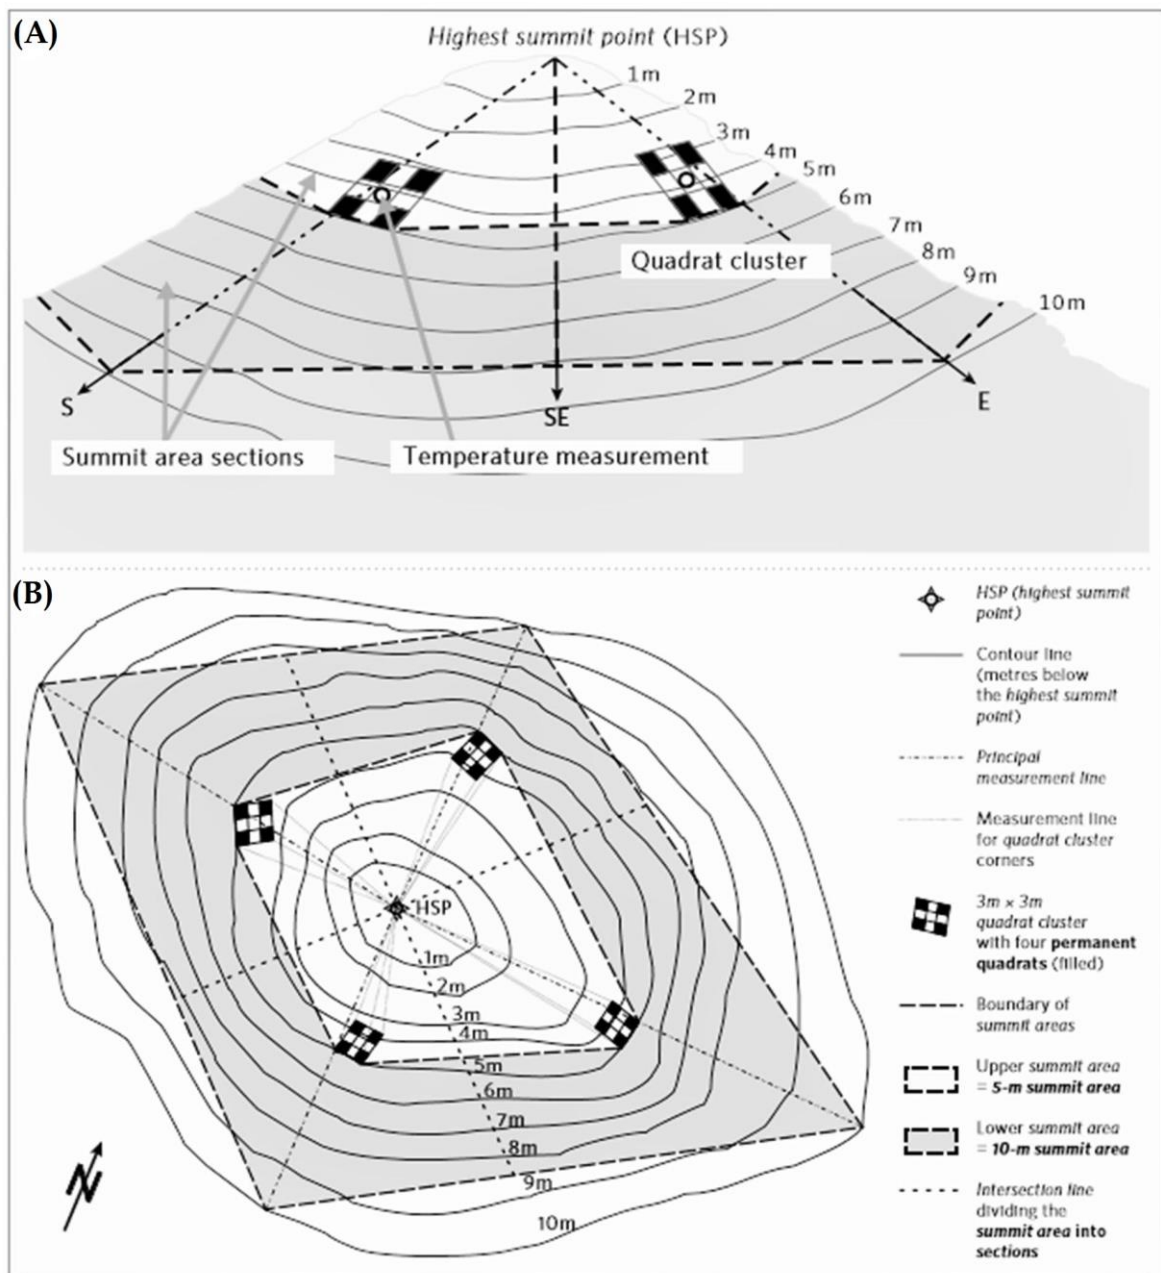

**Figure S1** Sampling design of the Multi-Summit approach using GLORIA protocol. **(A)** View of an idealized summit with schematic contour lines 5 and 10m below the highest summit point. **(B)** Top view of the area sampled (light and dark grey area), showing the four  $1 \text{ m}^2$  permanent plots (black quadrats), one in each compass direction. Additional explanations can be found in GLORIA field manual (Pauli et al., 2015, Source: The GLORIA field manual—standard multi-summit approach).

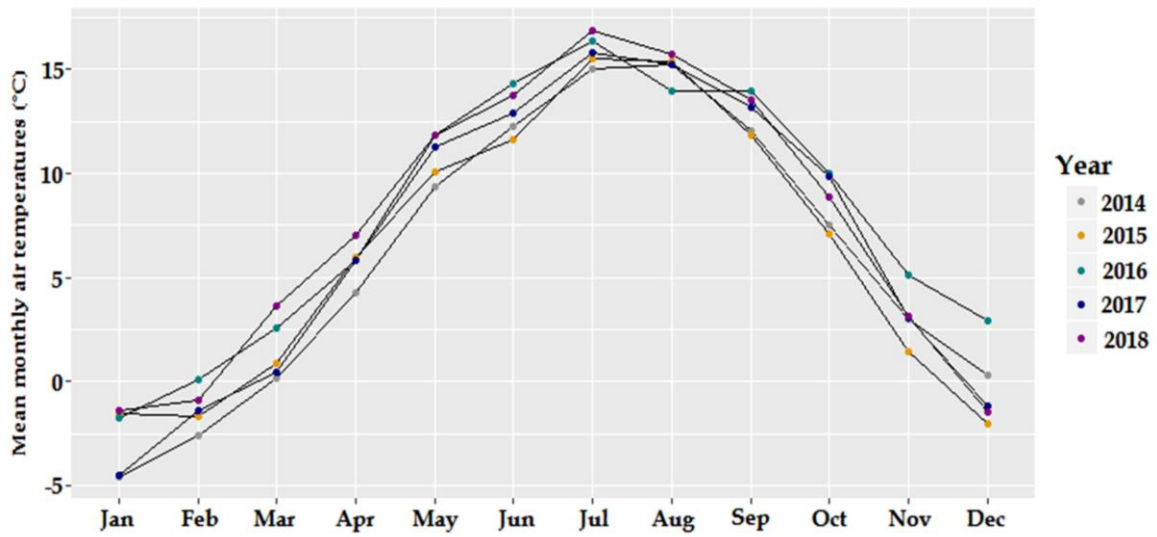

(A)

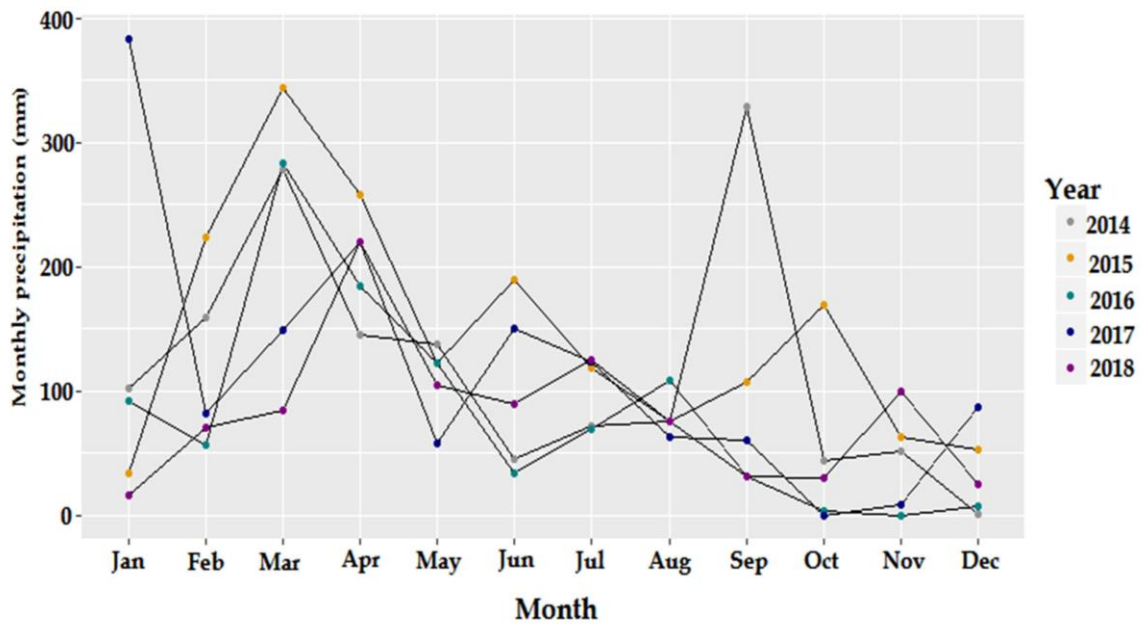

(B)

**Figure S2** Climate conditions at the study area between 2014 and 2018. (A) Monthly mean air temperatures, (B) monthly precipitation.

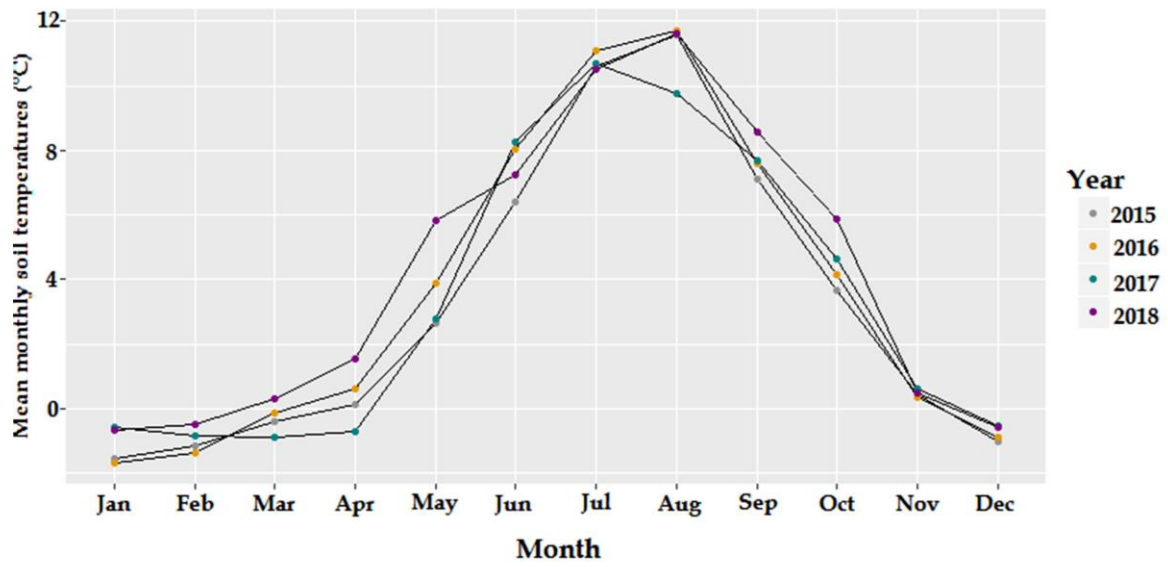

**Figure S3** Monthly mean soil temperatures at the study area between 2015 and 2018.

**Table S1** Description of the five abundance classes or categories, used to visually estimate the species cover percentage within the summit area sections (after Pauli et al., 2015).

| <b>Abundance class</b> | <b>Symbol</b> | <b>Description</b>                                                                                                                                                                                         |
|------------------------|---------------|------------------------------------------------------------------------------------------------------------------------------------------------------------------------------------------------------------|
| Abundant               | a             | Very abundant, often forming more or less patchy or dense vegetation layers; species covers more than 50% of the summit area section                                                                       |
| Common                 | c             | Frequent and widespread occurrence within the section; presence is obvious at the first glance, but it covers less than 50% of the summit area section                                                     |
| Scattered              | s             | Widespread within the section, species can hardly be overlooked, but the presence is not obvious at the first glance; individuals are not necessarily evenly dispersed over the entire summit area section |
| Rare                   | r             | Some individuals at several locations that can hardly be overlooked in a careful observation                                                                                                               |
| Very rare              | r!            | One or a few small individuals                                                                                                                                                                             |

**Table S2** Description and distribution margins of the elevational ranks applied in the study (after Gottfried et al., 2012).

| <b>Rank</b> | <b>Description</b>                                                                                                   | <b>Altitudinal distribution (lower margin / centre / upper margin)</b> |
|-------------|----------------------------------------------------------------------------------------------------------------------|------------------------------------------------------------------------|
| 1           | Species with a nival distribution centre                                                                             | nival / nival / nival                                                  |
| 2           | Alpine to nival species, not descending to treeline                                                                  | alpine / alpine / nival                                                |
| 3           | Alpine centred species, not descending to montane belt                                                               | treeline / alpine / alpine                                             |
| 4           | Alpine centred species, descending to montane belt or indifferently distributed from the alpine belt to the treeline | montane / alpine / alpine or treeline / indifferent / alpine           |
| 5           | Species centred in the treeline ecotone or indifferently distributed from montane to alpine belt                     | montane / treeline / alpine                                            |
| 6           | Species with a montane distribution centre or indifferently distributed from the montane belt to the treeline        | montane / montane / treeline                                           |

**Table S3** Elevational ranks for the vascular plants {based on the species' position on summit, supplemented with local floras (Dhar and Kachroo, 1983; Polunin and Stainton, 1984)}

| <b>Scientific Name</b>                              | <b>Rank</b> |
|-----------------------------------------------------|-------------|
| <i>Achillea millefolium</i> L.                      | 6           |
| <i>Aconitum heterophyllum</i> Wall. ex Royle        | 4           |
| <i>Aconitum violaceum</i> Jacquem. ex Stapf         | 3           |
| <i>Alchemilla trollii</i> Rothm.                    | 3           |
| <i>Anaphalis royleana</i> DC.                       | 5           |
| <i>Androsace rotundifolia</i> Hardw.                | 5           |
| <i>Anemone obtusiloba</i> D.Don                     | 5           |
| <i>Aquilegia fragrans</i> Benth                     | 6           |
| <i>Arabis tibetica</i> Hook.f. & Thomson            | 4           |
| <i>Artemisia roxburghiana</i> Besser                | 5           |
| <i>Aster falconeri</i> (C.B.Clarke) Hutch.          | 5           |
| <i>Aster thomsonii</i> C.B.Clarke                   | 6           |
| <i>Astragalus grahamianus</i> Benth.                | 6           |
| <i>Berberis jaeschkeana</i> C.K.Schneid.            | 5           |
| <i>Bergenia stracheyi</i> (Hook.f. & Thomson) Engl. | 5           |
| <i>Betula utilis</i> D.Don                          | 6           |
| <i>Bupleurum candollei</i> Wall. ex DC.             | 5           |
| <i>Campanula aristata</i> Wall.                     | 5           |
| <i>Carex nubigena</i> D.Don                         | 5           |
| <i>Cassiope fastigiata</i> (Wall.) D. Don           | 2           |
| <i>Cerastium glomeratum</i> Thuill.                 | 5           |
| <i>Chaerophyllum villosum</i> Wall. ex DC.          | 4           |
| <i>Chrysopogon gryllus</i> (L.) Trin.               | 5           |
| <i>Cimicifuga kashmiriana</i> J.Compton & Hedd.     | 6           |
| <i>Circaea alpina</i> L.                            | 5           |
| <i>Cirsium wallichii</i> DC.                        | 6           |

|                                                                        |   |
|------------------------------------------------------------------------|---|
| <i>Clinopodium umbrosum</i> (M.Bieb.) K.Koch                           | 5 |
| <i>Codonopsis ovata</i> Benth.                                         | 5 |
| <i>Cortia depressa</i> (D.Don) C.Norman                                | 5 |
| <i>Cortusa brotheri</i> (R.Knuth) Losinsk.                             | 2 |
| <i>Corydalis cashmeriana</i> Royle                                     | 2 |
| <i>Corydalis diphylla</i> Wall.                                        | 4 |
| <i>Corydalis rutifolia</i> (Sm.) DC.                                   | 4 |
| <i>Corydalis thyrsoflora</i> Prain                                     | 5 |
| <i>Cotoneaster microphyllus</i> Wall. ex Lindl.                        | 3 |
| <i>Cremanthodium decaisnei</i> C.B.Clarke                              | 1 |
| <i>Crepis sancta</i> (L.) Babc.                                        | 6 |
| <i>Crucihimalaya himalaica</i> (Edgew.) Al-Shehbaz, O'Kane & R.A.Price | 4 |
| <i>Cynoglossum wallichii</i> G. Don                                    | 6 |
| <i>Delphinium vestitum</i> Wall. ex Royle                              | 4 |
| <i>Dipsacus inermis</i> Wall.                                          | 5 |
| <i>Doronicum roylei</i> DC.                                            | 5 |
| <i>Elsholtzia eriostachya</i> (Benth.) Benth.                          | 2 |
| <i>Epilobium parviflorum</i> Schreb.                                   | 6 |
| <i>Erigeron multicaulis</i> Wall.                                      | 5 |
| <i>Euphorbia wallichii</i> Hook.f.                                     | 6 |
| <i>Euphrasia parviflora</i> Schag.                                     | 5 |
| <i>Fagopyrum tataricum</i> (L.) Gaertn.                                | 3 |
| <i>Galium aparine</i> L.                                               | 6 |
| <i>Gaultheria trichophylla</i> Royle                                   | 2 |
| <i>Gentiana carinata</i> (D. Don) Griseb.                              | 4 |
| <i>Geranium nepalense</i> Sweet                                        | 6 |
| <i>Geranium pratense</i> L.                                            | 6 |

|                                                                 |   |
|-----------------------------------------------------------------|---|
| <i>Geranium wallichianum</i> D. Don ex                          | 6 |
| <i>Geum elatum</i> Wall. ex G.Don                               | 5 |
| <i>Gypsophila sedifolia</i> Kurz                                | 6 |
| <i>Heracleum candicans</i> Wall. ex DC                          | 5 |
| <i>Hieracium umbellatum</i> L.                                  | 6 |
| <i>Impatiens brachycentra</i> Kar. & Kir.                       | 3 |
| <i>Impatiens sulcata</i> Wall.                                  | 6 |
| <i>Impatiens thomsonii</i> Hook.f.                              | 6 |
| <i>Inula royleana</i> DC.                                       | 5 |
| <i>Jaeschkea canaliculata</i> Knobl.                            | 5 |
| <i>Juniperus squamata</i> Buch.-Ham. ex D.Don                   | 4 |
| <i>Jurinea dolomiaea</i> Boiss.                                 | 4 |
| <i>Koeleria pyramidata</i> (Lam.) P.Beauv.                      | 5 |
| <i>Lactuca macrorhiza</i> (Royle) Hook.f.                       | 5 |
| <i>Lamium album</i> L.                                          | 2 |
| <i>Leontopodium jacotianum</i> Beauverd                         | 5 |
| <i>Ligularia amplexicaulis</i> DC.                              | 1 |
| <i>Ligularia fischeri</i> Turcz.                                | 2 |
| <i>Lomatogonium caeruleum</i> (Royle) Harry Sm. ex<br>B.L.Burtt | 5 |
| <i>Lonicera obovata</i> Royle ex Hook.f. & Thomson              | 3 |
| <i>Mazus pumilus</i> (Burm.f.) Steenis                          | 5 |
| <i>Meconopsis latifolia</i> (Prain) Prain                       | 2 |
| <i>Melica persica</i> Kunth                                     | 5 |
| <i>Morina coulteriana</i> Royle                                 | 5 |
| <i>Morina longifolia</i> Wall. ex DC.                           | 5 |
| <i>Myosotis alpestris</i> F.W.Schmidt                           | 6 |
| <i>Myosotis stricta</i> Link ex Roem. & Schult.                 | 5 |



|                                                                |   |
|----------------------------------------------------------------|---|
| <i>Nepeta connata</i> Royle ex Benth.                          | 5 |
| <i>Nepeta laevigata</i> (D.Don) Hand.-Mazz.                    | 4 |
| <i>Nepeta linearis</i> Royle ex Benth.                         | 5 |
| <i>Onosma hispida</i> Wall. ex G.Don                           | 6 |
| <i>Origanum vulgare</i> L.                                     | 6 |
| <i>Oxyria digyna</i> (L.) Hill                                 | 5 |
| <i>Pedicularis siphonantha</i> D. Don                          | 5 |
| <i>Phleum alpinum</i> L.                                       | 5 |
| <i>Phlomoidea bracteosa</i> (Royle ex Benth.) Kamelin & Makhm. | 5 |
| <i>Picris hieracioides</i> Sibth. & Sm.                        | 6 |
| <i>Pinus wallichiana</i> A.B. Jacks.                           | 6 |
| <i>Plantago himalaica</i> Pilg.                                | 5 |
| <i>Poa angustifolia</i> L.                                     | 5 |
| <i>Podophyllum hexandrum</i> Royle                             | 6 |
| <i>Polemonium caeruleum</i> L.                                 | 5 |
| <i>Polygonatum multiflorum</i> (L.) All.                       | 6 |
| <i>Polygonum affine</i> D. Don                                 | 4 |
| <i>Polygonum amplexicaule</i> D. Don                           | 6 |
| <i>Polypogon fugax</i> Nees ex Steud.                          | 5 |
| <i>Potentilla atrosanguinea</i> G. Lodd. ex D. Don             | 5 |
| <i>Primula elliptica</i> Royle                                 | 5 |
| <i>Primula macrophylla</i> D. Don                              | 5 |
| <i>Primula rosea</i> Royle                                     | 6 |
| <i>Pseudomertensia moltkioides</i> (Royle ex Benth.) Kazmi     | 6 |
| <i>Ranunculus brotherusii</i> Freyn                            | 5 |
| <i>Ranunculus hirtellus</i> Royle                              | 6 |
| <i>Ranunculus palmatifidus</i> Riedl                           | 6 |

|                                                   |   |
|---------------------------------------------------|---|
| <i>Rheum webbianum</i> Royle                      | 4 |
| <i>Rhodiola himalensis</i> (D. Don) S.H. Fu       | 6 |
| <i>Rhododendron anthopogon</i> D. Don             | 3 |
| <i>Ribes orientale</i> Desf.                      | 6 |
| <i>Rosa webbiana</i> Wall. ex Royle               | 5 |
| <i>Rumex nepalensis</i> Spreng.                   | 6 |
| <i>Salix denticulata</i> Andersson                | 6 |
| <i>Salix flabellaris</i> Andersson                | 2 |
| <i>Salvia hians</i> Royle ex Benth.               | 5 |
| <i>Saussurea candolleana</i> Wall. ex C.B. Clarke | 3 |
| <i>Saussurea costus</i> (Falc.) Lipsch.           | 5 |
| <i>Saxifraga hirculus</i> L.                      | 1 |
| <i>Saxifraga sibirica</i> L.                      | 3 |
| <i>Scutellaria prostrata</i> Jacquem. ex Benth.   | 5 |
| <i>Sedum ewersii</i> Ledeb.                       | 6 |
| <i>Senecio chrysanthemoides</i> DC.               | 5 |
| <i>Sibbaldia cuneata</i> Edgew.                   | 5 |
| <i>Sigesbeckia orientalis</i> L.                  | 6 |
| <i>Silene graminifolia</i> Otth                   | 5 |
| <i>Silene himalayensis</i> (Rohrb.) Majumdar      | 2 |
| <i>Silene nigrescens</i> (Edgew.) Majumdar        | 3 |
| <i>Solidago virgaurea</i> L.                      | 5 |
| <i>Stellaria decumbens</i> Edgew.                 | 6 |
| <i>Stipa sibirica</i> (L.) Lam.                   | 5 |
| <i>Swertia petiolata</i> D. Don                   | 4 |
| <i>Tanacetum tibeticum</i> Hook.f. & Thomson      | 4 |
| <i>Taraxacum officinale</i> aggr. auct.           | 5 |
| <i>Thalictrum alpinum</i> L.                      | 4 |

|                                                |   |
|------------------------------------------------|---|
| <i>Themeda anathera</i> (Nees ex Steud.) Hack. | 5 |
| <i>Thlaspi cochleariforme</i> DC.              | 4 |
| <i>Thymus linearis</i> Benth                   | 5 |
| <i>Trifolium pratense</i> L.                   | 6 |
| <i>Trifolium repens</i> L.                     | 6 |
| <i>Valeriana pyrolifolia</i> Decne             | 6 |
| <i>Verbascum thapsus</i> L.                    | 6 |
| <i>Veronica laxa</i> Benth.                    | 5 |
| <i>Viola biflora</i> L.                        | 5 |

**Table S4** One-way ANOVA results for the effect of year on growing degree days (GDD).

|                | <b>df</b> | <b>SSR</b> | <b>MSR</b> | <b>F</b> | <b>P</b> |
|----------------|-----------|------------|------------|----------|----------|
| Effect of year | 1         | 26         | 26.3       | 0.051    | 0.823    |
| Residuals      | 30        | 15509      | 517.0      |          |          |

**Table S5** A comparison of number of growing degree days (GDD) at summits between August 2014-July 2015 and August 2017-July 2018.

| <b>Summit</b> | <b>Year</b>           | <b>Aspect</b> |          |          |          |
|---------------|-----------------------|---------------|----------|----------|----------|
|               |                       | <b>N</b>      | <b>S</b> | <b>E</b> | <b>W</b> |
| <b>GUL1</b>   | August 2014-July 2015 | 77            | 116      | 109      | 82       |
|               | August 2017-July 2018 | 80            | 118      | 112      | 83       |
| <b>GUL2</b>   | August 2014-July 2015 | 61            | 93       | 98       | 68       |
|               | August 2017-July 2018 | 63            | 95       | 98       | 69       |
| <b>GUL3</b>   | August 2014-July 2015 | 53            | 50       | 78       | 55       |
|               | August 2017-July 2018 | 55            | 52       | 80       | 57       |
| <b>GUL4</b>   | August 2014-July 2015 | 46            | 70       | 67       | 37       |
|               | August 2017-July 2018 | 49            | 72       | 68       | 39       |

**Table S6** GUL1 **(A)** One-way ANOVA results for the effect of aspect (nested within summit) on species richness, and **(B)** Tukey multiple comparison test between aspects. Significant differences are indicated as ‘\*\*\*\*’ for  $P < 0.001$ , ‘\*\*\*’  $P < 0.01$ , ‘\*\*’  $P < 0.05$ , and ‘.’ for  $P < 0.1$ .

**(A)**

|                                               | <b>df</b> | <b>SSR</b> | <b>MSR</b> | <b>F</b> | <b>P</b>  |
|-----------------------------------------------|-----------|------------|------------|----------|-----------|
| Effect of aspect<br>(nested within<br>summit) | 3         | 126.5      | 42.17      | 5.988    | 0.0098 ** |
| Residuals                                     | 12        | 84.5       | 7.04       |          |           |

**(B)**

| <b>Pair wise<br/>comparison</b> | <b>Estimate<br/>Std.</b> | <b>SE</b> | <b>t</b> | <b>P</b>   |
|---------------------------------|--------------------------|-----------|----------|------------|
| N - E                           | -0.250                   | 1.876     | -0.133   | 0.99911    |
| S - E                           | 5.000                    | 1.876     | 2.665    | 0.08401 .  |
| W- E                            | -2.750                   | 1.876     | -1.466   | 0.48608    |
| S- N                            | 5.250                    | 1.876     | 2.798    | 0.06705 .  |
| W - N                           | -2.500                   | 1.876     | -1.332   | 0.56128    |
| W- S                            | -7.750                   | 1.876     | -4.130   | 0.00656 ** |

**Table S7** GUL2 (A) One-way ANOVA results for the effect of aspect (nested within summit) on species richness, and (B) Tukey multiple comparison test between aspects. Significant differences are indicated as ‘\*\*\*\*’ for  $P < 0.001$ , ‘\*\*\*’  $P < 0.01$ , ‘\*\*’  $P < 0.05$ , and ‘.’ for  $P < 0.1$ .

(A)

|                                         | <b>df</b> | <b>SSR</b> | <b>MSR</b> | <b>F</b> | <b>P</b>   |
|-----------------------------------------|-----------|------------|------------|----------|------------|
| Effect of aspect (nested within summit) | 3         | 74.75      | 24.917     | 10.31    | 0.00122 ** |
| Residuals                               | 12        | 29.00      | 2.417      |          |            |

(B)

| <b>Pair wise comparison</b> | <b>Estimate Std.</b> | <b>SE</b> | <b>t</b> | <b>P</b>   |
|-----------------------------|----------------------|-----------|----------|------------|
| N - E                       | 3.000                | 1.099     | 2.729    | 0.07520 .  |
| S - E                       | -2.500               | 1.099     | -2.274   | 0.15888    |
| W- E                        | -2.000               | 1.099     | -1.819   | 0.31152    |
| S- N                        | -5.500               | 1.099     | -5.003   | 0.00148 ** |
| W - N                       | -5.000               | 1.099     | -4.549   | 0.00324 ** |
| W- S                        | 0.500                | 1.099     | 0.455    | 0.96741    |

**Table S8 GUL3 (A)** One-way ANOVA results for the effect of aspect (nested within summit) on species richness, and **(B)** Tukey multiple comparison test between aspects. Significant differences are indicated as ‘\*\*\*\*’ for  $P < 0.001$ , ‘\*\*\*’  $P < 0.01$ , ‘\*\*’  $P < 0.05$ , and ‘.’ for  $P < 0.1$ .

**(A)**

|                                               | <b>df</b> | <b>SSR</b> | <b>MSR</b> | <b>F</b> | <b>P</b>      |
|-----------------------------------------------|-----------|------------|------------|----------|---------------|
| Effect of aspect<br>(nested within<br>summit) | 3         | 185.19     | 61.73      | 14.6     | 0.000262 **** |
| Residuals                                     | 12        | 50.75      | 4.23       |          |               |

**(B)**

| <b>Pair wise<br/>comparison</b> | <b>Estimate<br/>Std.</b> | <b>SE</b> | <b>t</b> | <b>P</b>     |
|---------------------------------|--------------------------|-----------|----------|--------------|
| N - E                           | 2.500                    | 1.454     | 1.719    | 0.35614      |
| S - E                           | -2.750                   | 1.454     | -1.891   | 0.28198      |
| W- E                            | 6.500                    | 1.454     | 4.470    | 0.00377 **   |
| S- N                            | -5.250                   | 1.454     | -3.610   | 0.01630 *    |
| W - N                           | 4.000                    | 1.454     | 2.751    | 0.07250 .    |
| W- S                            | 9.250                    | 1.454     | 6.361    | < 0.001 **** |

**Table S9** GUL4 (A) One-way ANOVA results for the effect of aspect (nested within summit) on species richness, and (B) Tukey multiple comparison test between aspects. Significant differences are indicated as ‘\*\*\*\*’ for  $P < 0.001$ , ‘\*\*\*’  $P < 0.01$ , ‘\*’  $P < 0.05$ , and ‘.’ for  $P < 0.1$ .

(A)

|                                               | <b>df</b> | <b>SSR</b> | <b>MSR</b> | <b>F</b> | <b>P</b>    |
|-----------------------------------------------|-----------|------------|------------|----------|-------------|
| Effect of aspect<br>(nested within<br>summit) | 3         | 153.2      | 51.08      | 29.9     | < 0.001**** |
| Residuals                                     | 12        | 20.5       | 1.71       |          |             |

(B)

| <b>Pair wise<br/>comparison</b> | <b>Estimate<br/>Std.</b> | <b>SE</b> | <b>t</b> | <b>P</b>    |
|---------------------------------|--------------------------|-----------|----------|-------------|
| N - E                           | -0.7500                  | 0.9242    | -0.812   | 0.8479      |
| S - E                           | 1.7500                   | 0.9242    | 1.894    | 0.2810      |
| W- E                            | -6.5000                  | 0.9242    | -7.033   | <0.001 **** |
| S- N                            | 2.5000                   | 0.9242    | 2.705    | 0.0785 .    |
| W - N                           | -5.7500                  | 0.9242    | -6.222   | <0.001 **** |
| W- S                            | -8.2500                  | 0.9242    | -8.927   | <0.001 **** |



**Table S10 (A)** One-way ANOVA results for the effect of summit on species richness, and **(B)** Tukey multiple comparison test between summits. Significant differences are indicated as ‘\*\*\*’ for  $P < 0.001$ , ‘\*\*’  $P < 0.01$ , ‘\*’  $P < 0.05$ , and ‘.’ for  $P < 0.1$ .

**(A)**

| <b>Summit</b>    | <b>df</b> | <b>SSR</b> | <b>MSR</b> | <b>F</b> | <b>P</b>   |
|------------------|-----------|------------|------------|----------|------------|
| Effect of summit | 3         | 947.6      | 315.88     | 28.62    | < 0.001*** |
| Residuals        | 124       | 1368.7     | 11.04      |          |            |

**(B)**

| <b>Pair wise comparison</b> | <b>Estimate Std.</b> | <b>SE</b> | <b>t</b> | <b>P</b>    |
|-----------------------------|----------------------|-----------|----------|-------------|
| GUL2-GUL1                   | -3.1563              | 0.8306    | -3.800   | 0.00131 **  |
| GUL3-GUL1                   | -7.5938              | 0.8306    | -9.143   | < 0.001 *** |
| GUL4-GUL1                   | -4.4062              | 0.8306    | -5.305   | < 0.001 *** |
| GUL3-GUL2                   | -4.4375              | 0.8306    | -5.343   | < 0.001 *** |
| GUL4-GUL2                   | -1.2500              | 0.8306    | -1.505   | 0.03761 *   |
| GUL4-GUL3                   | 3.1875               | 0.8306    | 3.838    | 0.00114 **  |

**Table S11** Two-way ANOVA results for the effect of summit and year of sampling on species richness. Significant differences are indicated as ‘\*\*\*’ for  $P < 0.001$ , ‘\*\*’  $P < 0.01$ , ‘\*’  $P < 0.05$ , and ‘.’ for  $P < 0.1$ .

|                                            | <b>df</b> | <b>SSR</b> | <b>MSR</b> | <b>F</b> | <b>P</b>   |
|--------------------------------------------|-----------|------------|------------|----------|------------|
| Effect of summit                           | 3         | 947.6      | 315.88     | 28.62    | < 0.001*** |
| Effect of year                             | 1         | 59.1       | 59.13      | 5.424    | 0.0215 *   |
| Interaction effect between summit and year | 3         | 50.2       | 12.40      | 3.37     | 0.0404 *   |
| Residuals                                  | 120       | 1308.3     | 10.90      |          |            |

**Table S12** Two-way ANOVA results for the effect of summit and aspect on soil temperature. Significant differences are indicated as ‘\*\*\*’ for  $P < 0.001$ , ‘\*\*’  $P < 0.01$ , ‘\*’  $P < 0.05$ , and ‘.’ for  $P < 0.1$ .

|                                              | <b>df</b> | <b>SSR</b> | <b>MSR</b> | <b>F</b> | <b>P</b>   |
|----------------------------------------------|-----------|------------|------------|----------|------------|
| Effect of summit                             | 3         | 53.98      | 17.995     | 7662.5   | < 0.001*** |
| Effect of aspect                             | 3         | 24.51      | 8.171      | 3479..3  | < 0.001*** |
| Interaction effect between summit and aspect | 9         | 14.01      | 1.557      | 662.8    | < 0.001*** |
| Residuals                                    | 48        | 0.11       | 0.002      |          |            |
